# Supplementary material for: Magnetic coupling in a hybrid Mn(ii) acetylene dicarboxylate
Source: Royal Society of Chemistry journal article supplement (doi:10.1039/c6cp06886c), 2016-01-01
Supplement: c6cp06886c1.pdf [file c6cp06886c1.pdf]

**Supporting Information:**

**Magnetic coupling in a hybrid Mn(II) acetylene dicarboxylate**

Christopher H. Hendon<sup>1\*</sup>, Fabienne Pradaux-Caggiano<sup>2</sup>, Lauren E. Hatcher<sup>2</sup>, William J. Gee<sup>2</sup>,  
Chick C. Wilson<sup>2</sup>, Keith T. Butler<sup>2</sup>, David R. Carbery<sup>2</sup>, Aron Walsh<sup>3</sup>, Brent C. Melot<sup>4\*</sup>

<sup>1</sup> Department of Chemistry, Massachusetts Institute of Technology, Cambridge, MA, 02139, USA

<sup>2</sup> Department of Chemistry, University of Bath, Bath, BA2 7AY, UK

<sup>3</sup> Department of Materials, Imperial College London, London, SW7 2AZ, UK

<sup>4</sup> Department of Chemistry, University of Southern California, Los Angeles, CA, 90089, USA

hendon@mit.edu, melot@usc.edu

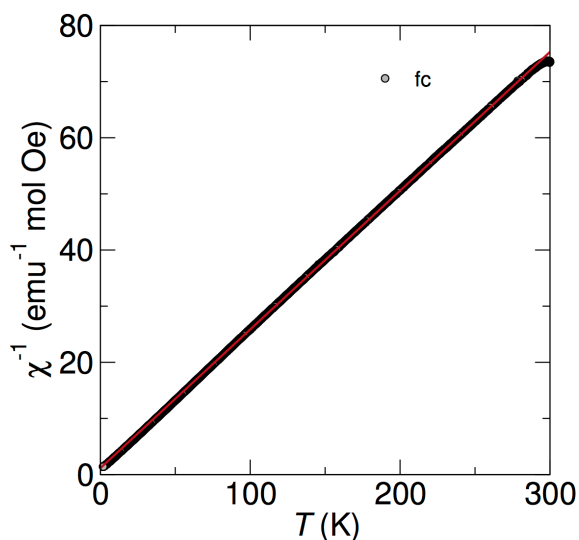

Figure S1: Mn-ACDC  $\chi^{-1}$  vs T. The fit gave a Curie constant of 4.08 emu K/mol.
